# Supplementary material
Source: Elsevier journal article supplement (http://researchonline.lshtm.ac.uk/505520/1/mmc1.docx)
Supplement: mmc1 [file mmc1.docx]

**Web Table 1. Association between IL-18 (tertiles) and cardiovascular risk factors in the stroke control sample (n=590)**

|  | Low (96-329pg/ml) N= 197 | Medium (330-454pg/ml) N= 198 | High (455-2500pg/ml) N= 195 | | Trend p-value* |
| --- | --- | --- | --- | --- | --- |
| **Demographic/questionnaire** |  |  |  | |  |
| Age (years) | 71.06 | 71.10 | 71.85 | | 0.134 |
| Male, n(%) | 97 (49.2) | 137 (69.2) | 138 (70.8) | | <0.001 |
| Northern region, n(%)† | 69 (35.0) | 80 (40.4) | 72 (36.9) | | 0.696 |
| Non-manual occupation, n(%)† | 99 (53.1) | 86 (45.3) | 74 (41.8) | | 0.026 |
| Evidence of CVD, n(%) | 25 (12.7) | 29 (14.7) | 34 (17.4) | | 0.188 |
| History of diabetes, n(%) | 19 (9.6) | 22 (11.1) | 31 (15.9) | | 0.060 |
| 1-2 alcoholic drinks/day, n(%) | 68 (37.6) | 79 (42.5) | 63 (34.6) | | 0.561 |
| Current smoker, n(%) | 11 (5.6) | 23 (11.6) | 23 (11.9) | | 0.039 |
| Physical activity (inactive/occasional), n(%) | 130 (67.7) | 129 (67.5) | 121 (65.8) | | 0.906 |
| **Physical measurements** |  |  |  | |  |
| Body Mass Index (Kg/m2) ‡|| | 26.65 | 27.45 | 27.23 | | 0.178 |
| Systolic blood pressure (mm/Hg) ‡§|| | 147.51 | 149.26 | 150.90 | | 0.177 |
| Diastolic blood pressure (mm/Hg) ‡§|| | 81.71 | 82.97 | 82.36 | | 0.585 |
| FEV1 (L/min) ‡||** | 2.29 | 2.23 | 2.20 | | 0.113 |
| **Lipids / Metabolic markers** |  |  |  | |  |
| Total cholesterol (mMol/L) | 6.28 | 6.43 | 6.23 | | 0.686 |
| HDL cholesterol (mMol/L) | 1.52 | 1.40 | 1.35 | | <0.001 |
| Triglyceride (mMol/L) ‡§# | 1.46 | 1.76 | 1.89 | | <0.001 |
| Insulin (mU/L) ‡§# | 7.21 | 8.46 | 9.19 | 0.001 | |
| Glucose (mMol/L) ‡§# | 5.72 | 5.86 | 6.02 | | 0.027 |
| **Inflammatory and hemostatic markers** |  |  |  | |  |
| C-Reactive Protein (mg/L)‡# | 1.61 | 2.01 | 2.20 | | 0.008 |
| IL-6(pg/ml)‡§# | 2.39 | 2.48 | 2.71 | | 0.073 |
| Fibrinogen(g/L)‡§# | 3.27 | 3.23 | 3.34 | | 0.285 |
| White cell count (^109/L)‡§# | 6.53 | 7.02 | 7.18 | | 0.001 |
| Plasma viscosity (mPa.s) ‡§ | 1.27 | 1.29 | 1.30 | | 0.019 |
| Factor VIII (IU/dL) ‡ | 139.80 | 144.46 | 149.31 | | 0.009 |
| Fibrin D-dimer (ng/ml) ‡# | 94.98 | 88.35 | 99.58 | | 0.554 |
| Von Willebrand Factor (IU/dL) ‡ | 140.03 | 147.45 | 154.59 | | 0.001 |
| t-PA (ng/ml) ‡§ | 9.51 | 10.83 | 10.90 | | 0.001 |

*sample (n=596) MI controls with IL-18 value. Trend test adjusted for age, gender, region of residence

† reported in 1978-1980(age 40-59 years) for men and in 1998-2000 (age 60-79 years) for women

‡ adjusted for age at survey and region of residence (Scotland, North, Midlands and South).

§ adjusted for time of day

|| adjusted for nurse number

# geometric mean, p value from linear regression with ln(variable)

** adjusted for height squared
